# Supplementary material for: Nitrative DNA damage in cultured macrophages exposed to indium oxide
Source: PubMed Central journal article supplement — J Occup Health. 2017 Nov 29;60(2):148–55. doi: 10.1539/joh.17-0146-OA (PMC5886882; doi:10.1539/joh.17-0146-oa), 2017-11-29
Supplement: 1348-9585-60-148-s001.pdf [file 1348-9585-60-148-s001.pdf]

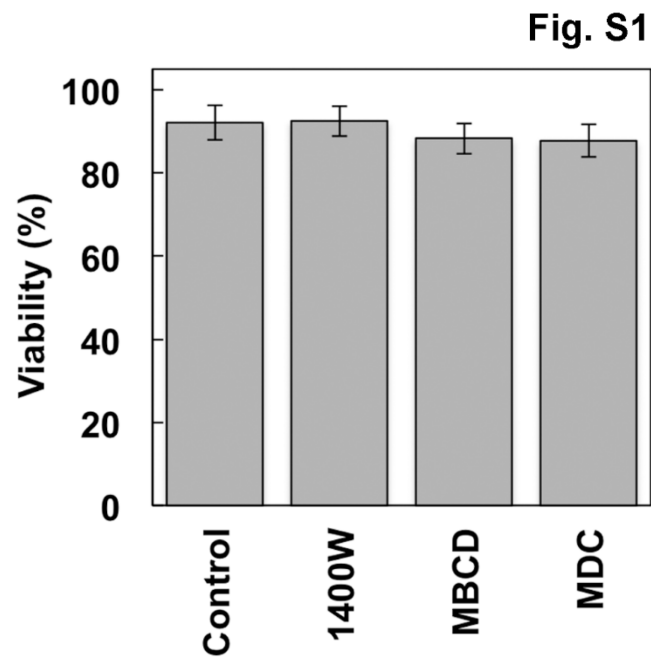

**Figure S1.** Cytotoxicity of iNOS and endocytosis inhibitors. RAW 264.7 cells were treated with 1  $\mu$ M 1400W, 0.5 mM MBCD or 50  $\mu$ M MDC alone for 8 h at 37° C without In<sub>2</sub>O<sub>3</sub>. Cell viability was evaluated by trypan blue exclusion assay. The data were expressed as means  $\pm$  SD of 7–8 independent experiments.
